# Supplementary material for: Mechanistic aspects of the gas-phase coupling of thioanisole and chlorobenzene to dibenzothiophene catalyzed by atomic Ho+
Source: Royal Society of Chemistry journal article supplement (doi:10.1039/c5cp01038a), 2015-01-01
Supplement: c5cp01038a1.pdf [file c5cp01038a1.pdf]

## Electronic Supplementary Information

### Mechanistic Aspects of the Gas-Phase Coupling of Thioanisole and Chlorobenzene to Dibenzothiophene Catalyzed by Atomic Ho<sup>+</sup>

Shaodong Zhou, Maria Schlangen, and Helmut Schwarz\*

*Institut für Chemie, Technische Universität Berlin, Straße des 17. Juni 135, 10623 Berlin,  
Germany*

*Email: [helmut.schwarz@tu-berlin.de](mailto:helmut.schwarz@tu-berlin.de)*

*Dedicated to Professor R. N. Zare, Stanford University, on the occasion of his 75<sup>th</sup> birthday.*

## Experimental Section and Computational Details

The experiments were carried out in a Spectrospin-CMS-47X Fourier-transform ion cyclotron resonance (FT-ICR) mass spectrometer as described elsewhere<sup>1-3</sup>. Holmium cations Ho<sup>+</sup> were generated by laser ablation of holmium target using a Nd:YAG laser ( $\lambda=1064$  nm) with helium as carrier gas; the holmium target was prepared using a pure metal foil commercially available from Sigma-Aldrich Corporation. The ions generated were transferred from the external ion source into the cylindrical ICR-cell which is fixed in a superconducting magnet field (7.05T), by using a system of electrostatic potentials and lenses. Mass selection was performed using the FERETS<sup>4</sup> ion ejection protocol. Thermalization of the ions of interest has been achieved by collisions with repeatedly pulsed-in argon. Reaction efficiencies were determined via the pseudo-first-order decay of the reactant ions and are reported as percentage of the theoretical collision rate according to the average dipole orientation approximation ( $k_{ADO}$ )<sup>5</sup>. Collision-induced dissociation experiments were performed for structural investigations via introducing argon into the ICR cell for collisions with the ion of interest; prior to that, the latter ion has been translationally excited to increase its kinetic energy.

The theoretical studies were performed using the Gaussian 09 program<sup>6</sup> at the density functional theory level of theory using the B3LYP<sup>7-10</sup> functional including DFT-D3 dispersion correction<sup>11</sup>; a small-core pseudo potential<sup>12</sup> and the corresponding atomic natural orbital contracted valence basis sets<sup>13,14</sup> were applied for holmium, and the def2-TZVP basis set<sup>15</sup> was used for all other atoms. Stationary and saddle points were located and confirmed by vibrational frequency analysis. Intrinsic reaction coordinate<sup>16-18</sup> calculations were performed to link transition structures with the respective intermediates. The Natural Bond Orbital<sup>19-24</sup> (NBO) analysis was performed to obtain the electronic configurations of the different structures. Finally, unscaled vibrational frequencies were used to include zero-point energy (ZPE) corrections.

## Figures

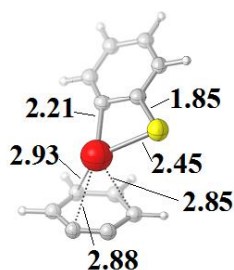

**Fig. 1** Structural information of the complex of  $\text{Ho}(\text{C}_6\text{H}_4\text{S})^+$  with benzyne ( $[\text{Ho}(\text{C}_6\text{H}_4\text{S})(\text{C}_6\text{H}_4)]^+$ ). Selected bond lengths are given in Å; charges are omitted for the sake of clarity.

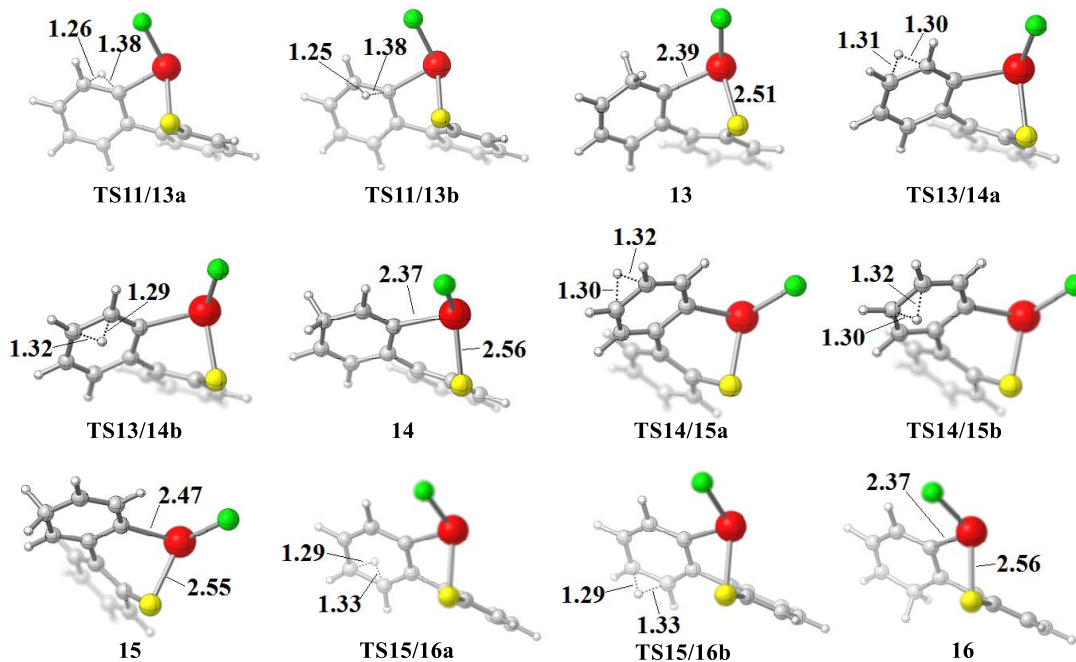

**Fig. 2** Structural information of the associated coordinates for the hydrogen migration along the phenyl ring starting from intermediate **11**; the notations **a** and **b** for the transition structures stand for the migrations on both sites of the ring, respectively. Selected bond lengths are given in Å; charges are omitted for the sake of clarity.

## References

1. K. Eller and H. Schwarz, *Int. J. Mass Spectrom. Ion Processes*, 1989, **93**, 243-257.
2. K. Eller, W. Zummack and H. Schwarz, *J. Am. Chem. Soc.*, 1990, **112**, 621-627.
3. M. Engeser, T. Weiske, D. Schroder and H. Schwarz, *J. Phys. Chem. A*, 2003, **107**, 2855-2859.
4. R. A. Forbes, F. H. Laukien and J. Wronka, *Int. J. Mass Spectrom. Ion Processes*, 1988, **83**, 23-44.

5. M. T. Bowers and J. B. Ludenslager, *J. Chem. Phys.*, 1972, **56**, 4711-4712.
6. M. J. Frisch, G. W. Trucks, H. B. Schlegel, G. E. Scuseria, M. A. Robb, J. R. Cheeseman, G. Scalmani, V. Barone, B. Mennucci, G. A. Petersson, H. Nakatsuji, M. Caricato, X. Li, H. P. Hratchian, A. F. Izmaylov, J. Bloino, G. Zheng, J. L. Sonnenberg, M. Hada, M. Ehara, K. Toyota, R. Fukuda, J. Hasegawa, M. Ishida, T. Nakajima, Y. Honda, O. Kitao, H. Nakai, T. Vreven, J. A. Montgomery, Jr., J. E. Peralta, F. Ogliaro, M. Bearpark, J. J. Heyd, E. Brothers, K. N. Kudin, V. N. Staroverov, R. Kobayashi, J. Normand, K. Raghavachari, A. Rendell, J. C. Burant, S. S. Iyengar, J. Tomasi, M. Cossi, N. Rega, J. M. Millam, M. Klene, J. E. Knox, J. B. Cross, V. Bakken, C. Adamo, J. Jaramillo, R. Gomperts, R. E. Stratmann, O. Yazyev, A. J. Austin, R. Cammi, C. Pomelli, J. W. Ochterski, R. L. Martin, K. Morokuma, V. G. Zakrzewski, G. A. Voth, P. Salvador, J. J. Dannenberg, S. Dapprich, A. D. Daniels, O. Farkas, J. B. Foresman, J. V. Ortiz, J. Cioslowski and D. J. Fox, Gaussian 09, Revision A.02, Gaussian, Inc., Wallingford CT, 2009.
7. C. T. Lee, W. T. Yang and R. G. Parr, *Phys. Rev. B*, 1988, **37**, 785-789.
8. B. Miehlich, A. Savin, H. Stoll and H. Preuss, *Chem. Phys. Lett.*, 1989, **157**, 200-206.
9. A. D. Becke, *J. Chem. Phys.*, 1993, **98**, 1372-1377.
10. A. D. Becke, *J. Chem. Phys.*, 1993, **98**, 5648-5652.
11. S. Grimme, J. Antony, S. Ehrlich and H. Krieg, *J. Chem. Phys.*, 2010, **132**.
12. M. Dolg, H. Stoll and H. Preuss, *J. Chem. Phys.*, 1989, **90**, 1730-1734.
13. X. Y. Cao and M. Dolg, *J. Chem. Phys.*, 2001, **115**, 7348-7355.
14. X. Y. Cao and M. Dolg, *J. Mol. Struct. Theochem*, 2002, **581**, 139-147.
15. F. Weigend and R. Ahlrichs, *Phys. Chem. Chem. Phys.*, 2005, **7**, 3297-3305.
16. K. Fukui, *Acc. Chem. Res.*, 1981, **14**, 363-368.
17. D. G. Truhlar, N. J. Kilpatrick and B. C. Garrett, *J. Chem. Phys.*, 1983, **78**, 2438-2442.
18. H. P. Hratchian and H. B. Schlegel, *J. Chem. Theory Comput.*, 2005, **1**, 61-69.
19. J. P. Foster and F. Weinhold, *J. Am. Chem. Soc.*, 1980, **102**, 7211-7218.
20. A. E. Reed and F. Weinhold, *J. Chem. Phys.*, 1983, **78**, 4066-4073.
21. A. E. Reed, R. B. Weinstock and F. Weinhold, *J. Chem. Phys.*, 1985, **83**, 735-746.
22. A. E. Reed and F. Weinhold, *J. Chem. Phys.*, 1985, **83**, 1736-1740.
23. J. E. Carpenter and F. Weinhold, *J. Mol. Struct. Theochem*, 1988, **46**, 41-62.
24. A. E. Reed, L. A. Curtiss and F. Weinhold, *Chem. Rev.*, 1988, **88**, 899-926.
